# Supplementary material for: Two-Stage Global Optimisation Hybrid Method for Energy Storage Configuration in Distribution Networks
Source: Research Square preprint supplement (doi:10.21203/rs.3.rs-7392630/v1), 2025-09-19
Supplement: Supplementary file 1 [file 7b52432eada2ab490a53244c.docx]

### Data Description

**Table 1** Parameters of the 33-bus system

| Line starting point | Line end point | Line resistance /Ω | Line reactance /Ω | Load connected to the tail node /(kV·A) |
| --- | --- | --- | --- | --- |
| 1 | 2 | 0.0922 | 0.0470 | 100+j60 |
| 2 | 3 | 0.4930 | 0.2511 | 90+j40 |
| 3 | 4 | 0.3660 | 0.1864 | 120+j80 |
| 4 | 5 | 0.3811 | 0.1941 | 60+j30 |
| 5 | 6 | 0.9510 | 0.7070 | 75+j25 |
| 6 | 7 | 0.2164 | 0.5612 | 240+j115 |
| 7 | 8 | 0.7114 | 0.2351 | 200+j100 |
| 8 | 9 | 1.0300 | 0.7400 | 60+j20 |
| 9 | 10 | 1.0440 | 0.7400 | 60+j20 |
| 10 | 11 | 0.1966 | 0.0650 | 45+j30 |
| 11 | 12 | 0.3744 | 0.1238 | 60+j35 |
| 12 | 13 | 1.4680 | 1.1550 | 60+j35 |
| 13 | 14 | 0.5416 | 0.7129 | 120+j80 |
| 14 | 15 | 0.5910 | 0.5260 | 60+j10 |
| 15 | 16 | 0.7463 | 0.5450 | 60+j20 |
| 16 | 17 | 1.2890 | 1.7210 | 60+j20 |
| 17 | 18 | 0.4220 | 0.5274 | 150+j65 |
| 2 | 19 | 0.1640 | 0.1565 | 90+j40 |
| 19 | 20 | 1.5042 | 1.3554 | 90+j40 |
| 20 | 21 | 0.4095 | 0.4784 | 90+j40 |
| 21 | 22 | 0.7516 | 0.8519 | 110+j35 |
| 3 | 23 | 0.4512 | 0.3083 | 90+j50 |
| 23 | 24 | 0.8980 | 0.7091 | 420+j200 |
| 24 | 25 | 0.8960 | 0.7011 | 420+j200 |
| 6 | 26 | 0.2030 | 0.1034 | 60+j25 |
| 26 | 27 | 0.2842 | 0.1447 | 60+j25 |
| 27 | 28 | 1.0590 | 0.9337 | 60+j20 |
| 28 | 29 | 0.8042 | 0.7006 | 120+j70 |
| 29 | 30 | 0.5075 | 0.2585 | 200+j600 |
| 30 | 31 | 0.9744 | 0.9630 | 150+j70 |
| 31 | 32 | 0.3105 | 0.3619 | 210+j100 |
| 32 | 33 | 0.3840 | 0.5263 | 50+j15 |

**Table 2** The unit price of the energy storage part is configured

| /( CNY·kWh-1) | /( CNY·kWh-1) | /( CNY元·kW-1) | /( CNY元·kW-1) | /(元·kW-1) | /(元·kW-1) |
| --- | --- | --- | --- | --- | --- |
| 678 | 1578 | 802 | 5652 | 3 | 0.05 |
